# Supplementary material for: The Chemokine Receptor CCR3 Is Potentially Involved in the Homing of Prostate Cancer Cells to Bone: Implication of Bone-Marrow Adipocytes
Source: MDPI journal article supplement (doi:10.3390/ijms22041994), 2021-02-17
Supplement: s1 [file s1]

# Figure S1

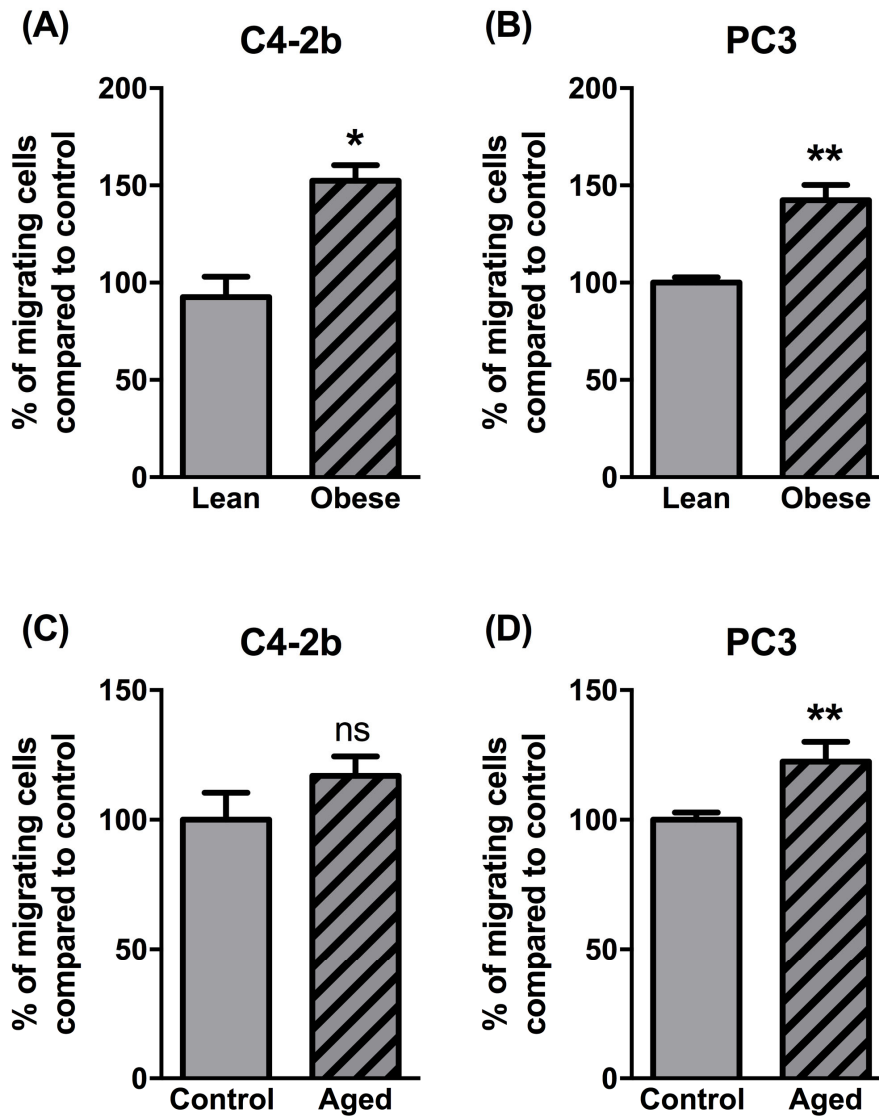

Figure S1. Supporting Information:

## Figure S1. Regulation of the chemotaxis of PCa cells towards SAT-CM by obesity and ageing.

*In vitro* migration of C4-2B (A) or PC3 (B) towards conditioned medium SAT (SAT-CM) from lean (age:  $62,8 \pm 6,9$  years, BMI:  $21,4 \pm 3,3$  kg/m<sup>2</sup>) or obese (age:  $63,3 \pm 10,1$  years, BMI:  $33,3 \pm 2,3$  kg/m<sup>2</sup>) subjects (n=5/group). *In vitro* migration of C4-2B (C) or PC3 (D) towards conditioned medium SAT (SAT-CM) of aged (age:  $75,7 \pm 5,7$  years, BMI:  $23,3 \pm 4,3$ kg/m<sup>2</sup>) or younger control (age:  $60,2 \pm 5,2$  years, BMI:  $22,1 \pm 3,5$ kg/m<sup>2</sup>) subjects (n=5/group). Data are shown as mean  $\pm$  sem. Statistical analysis by Student t test was performed. \* p<0.05, \*\*p<0.01, ns: not significant.
